# Supplementary material for: Employment of triketones to construct a dysprosium(iii) single-molecule magnet
Source: Royal Society of Chemistry journal article supplement (doi:10.1039/c4dt03494e), 2015-01-01
Supplement: c4dt03494e1.pdf [file c4dt03494e1.pdf]

## Employment of triketone to construct dysprosium(III) single-molecule magnet

Chao Wang,<sup>a</sup> Shuang-Yan Lin,<sup>a</sup> Jianfeng Wu,<sup>a,b</sup> Sen-Wen Yuan<sup>a</sup> and Jinkui Tang<sup>\*a</sup>

<sup>a</sup> State Key Laboratory of Rare Earth Resource Utilization, Changchun Institute of Applied Chemistry, Chinese Academy of Sciences, Changchun 130022, P. R. China

<sup>b</sup> University of Chinese Academy of Sciences, Beijing, 100049, P. R. China

**Table S1.** Selected bond lengths (Å) and angles (°) for complex **1**

|                 |           |                 |           |
|-----------------|-----------|-----------------|-----------|
| Dy(1)-O(3)      | 2.245(12) | Dy(1)-O(6)      | 2.253(11) |
| Dy(1)-O(9)      | 2.306(13) | Dy(1)-O(8)      | 2.349(11) |
| Dy(1)-O(5)      | 2.406(10) | Dy(1)-O(2)      | 2.441(11) |
| Dy(1)-N(2)      | 2.558(14) | Dy(1)-N(1)      | 2.562(14) |
| Dy(2)-O(1)      | 2.229(12) | Dy(2)-O(4)      | 2.271(12) |
| Dy(2)-O(7)      | 2.313(13) | Dy(2)-O(8)      | 2.390(10) |
| Dy(2)-O(2)      | 2.415(11) | Dy(2)-O(5)      | 2.452(10) |
| Dy(2)-N(3)      | 2.501(15) | Dy(2)-N(4)      | 2.528(14) |
| O(3)-Dy(1)-O(6) | 84.3(4)   | O(3)-Dy(1)-O(9) | 144.5(4)  |
| O(6)-Dy(1)-O(9) | 77.7(5)   | O(3)-Dy(1)-O(8) | 140.2(4)  |
| O(6)-Dy(1)-O(8) | 131.1(4)  | O(9)-Dy(1)-O(8) | 71.2(4)   |
| O(3)-Dy(1)-O(5) | 114.5(4)  | O(6)-Dy(1)-O(5) | 73.9(4)   |
| O(9)-Dy(1)-O(5) | 89.7(4)   | O(8)-Dy(1)-O(5) | 69.2(3)   |
| O(3)-Dy(1)-O(2) | 74.9(4)   | O(6)-Dy(1)-O(2) | 122.2(4)  |
| O(9)-Dy(1)-O(2) | 140.4(4)  | O(8)-Dy(1)-O(2) | 70.5(4)   |
| O(5)-Dy(1)-O(2) | 67.6(4)   | O(3)-Dy(1)-N(2) | 73.3(4)   |
| O(6)-Dy(1)-N(2) | 84.6(4)   | O(9)-Dy(1)-N(2) | 74.7(5)   |
| O(8)-Dy(1)-N(2) | 120.6(4)  | O(5)-Dy(1)-N(2) | 155.8(4)  |
| O(2)-Dy(1)-N(2) | 135.4(4)  | O(3)-Dy(1)-N(1) | 80.4(4)   |
| O(6)-Dy(1)-N(1) | 148.3(4)  | O(9)-Dy(1)-N(1) | 99.4(5)   |
| O(8)-Dy(1)-N(1) | 74.9(4)   | O(5)-Dy(1)-N(1) | 137.7(4)  |
| O(2)-Dy(1)-N(1) | 80.1(4)   | N(2)-Dy(1)-N(1) | 64.5(4)   |
| O(1)-Dy(2)-O(4) | 79.1(4)   | O(1)-Dy(2)-O(7) | 86.9(5)   |
| O(4)-Dy(2)-O(7) | 148.5(4)  | O(1)-Dy(2)-O(8) | 136.8(4)  |
| O(4)-Dy(2)-O(8) | 136.6(4)  | O(7)-Dy(2)-O(8) | 70.8(4)   |
| O(1)-Dy(2)-O(2) | 75.9(4)   | O(4)-Dy(2)-O(2) | 108.0(4)  |
| O(7)-Dy(2)-O(2) | 95.6(4)   | O(8)-Dy(2)-O(2) | 70.2(4)   |
| O(1)-Dy(2)-O(5) | 121.8(4)  | O(4)-Dy(2)-O(5) | 71.8(4)   |
| O(7)-Dy(2)-O(5) | 138.4(4)  | O(8)-Dy(2)-O(5) | 67.8(3)   |
| O(2)-Dy(2)-O(5) | 67.2(4)   | O(1)-Dy(2)-N(3) | 142.8(5)  |
| O(4)-Dy(2)-N(3) | 82.7(4)   | O(7)-Dy(2)-N(3) | 92.1(4)   |

|                  |          |                  |          |
|------------------|----------|------------------|----------|
| O(8)-Dy(2)-N(3)  | 76.4(4)  | O(2)-Dy(2)-N(3)  | 140.9(4) |
| O(5)-Dy(2)-N(3)  | 81.8(4)  | O(1)-Dy(2)-N(4)  | 78.4(5)  |
| O(4)-Dy(2)-N(4)  | 72.9(4)  | O(7)-Dy(2)-N(4)  | 76.7(4)  |
| O(8)-Dy(2)-N(4)  | 128.1(4) | O(2)-Dy(2)-N(4)  | 153.5(4) |
| O(5)-Dy(2)-N(4)  | 134.1(4) | N(3)-Dy(2)-N(4)  | 65.4(5)  |
| Dy(1)-O(2)-Dy(2) | 97.5(4)  | Dy(1)-O(5)-Dy(2) | 97.4(3)  |
| Dy(1)-O(8)-Dy(2) | 100.7(4) |                  |          |

**Table S2.** Selected bond lengths (Å) and angles (°) for complex **2**

|                 |            |                 |            |
|-----------------|------------|-----------------|------------|
| N(1)-Nd(1)      | 2.610(3)   | N(2)-Nd(1)      | 2.637(4)   |
| N(3)-Nd(2)      | 2.642(4)   | N(4)-Nd(2)      | 2.586(4)   |
| Nd(1)-O(4)      | 2.294(3)   | Nd(1)-O(1)      | 2.342(3)   |
| Nd(1)-O(8)      | 2.371(3)   | Nd(1)-O(7)      | 2.423(3)   |
| Nd(1)-O(5)      | 2.496(3)   | Nd(1)-O(2)      | 2.548(3)   |
| Nd(2)-O(3)      | 2.300(3)   | Nd(2)-O(6)      | 2.339(3)   |
| Nd(2)-O(8)      | 2.376(3)   | Nd(2)-O(9)      | 2.419(3)   |
| Nd(2)-O(2)      | 2.505(3)   | Nd(2)-O(5)      | 2.560(3)   |
| O(4)-Nd(1)-O(1) | 84.60(11)  | O(4)-Nd(1)-O(8) | 137.29(10) |
| O(1)-Nd(1)-O(8) | 132.98(11) | O(4)-Nd(1)-O(7) | 82.64(12)  |
| O(1)-Nd(1)-O(7) | 154.99(10) | O(8)-Nd(1)-O(7) | 68.32(11)  |
| O(4)-Nd(1)-O(5) | 74.81(10)  | O(1)-Nd(1)-O(5) | 116.24(10) |
| O(8)-Nd(1)-O(5) | 70.33(9)   | O(7)-Nd(1)-O(5) | 80.87(10)  |
| O(4)-Nd(1)-O(2) | 117.54(11) | O(1)-Nd(1)-O(2) | 71.91(10)  |
| O(8)-Nd(1)-O(2) | 69.35(10)  | O(7)-Nd(1)-O(2) | 133.10(9)  |
| O(5)-Nd(1)-O(2) | 66.59(9)   | O(4)-Nd(1)-N(1) | 85.95(11)  |
| O(1)-Nd(1)-N(1) | 85.66(11)  | O(8)-Nd(1)-N(1) | 112.24(10) |
| O(7)-Nd(1)-N(1) | 72.08(11)  | O(5)-Nd(1)-N(1) | 148.58(11) |
| O(2)-Nd(1)-N(1) | 144.72(10) | O(4)-Nd(1)-N(2) | 141.66(11) |
| O(1)-Nd(1)-N(2) | 72.77(11)  | O(8)-Nd(1)-N(2) | 78.11(10)  |
| O(7)-Nd(1)-N(2) | 105.22(11) | O(5)-Nd(1)-N(2) | 143.00(10) |
| O(2)-Nd(1)-N(2) | 84.75(10)  | N(1)-Nd(1)-N(2) | 62.33(12)  |
| O(3)-Nd(2)-O(6) | 88.98(11)  | O(3)-Nd(2)-O(8) | 135.37(10) |
| O(6)-Nd(2)-O(8) | 131.48(11) | O(3)-Nd(2)-O(9) | 81.53(12)  |
| O(6)-Nd(2)-O(9) | 154.10(11) | O(8)-Nd(2)-O(9) | 68.08(11)  |
| O(3)-Nd(2)-O(2) | 74.57(10)  | O(6)-Nd(2)-O(2) | 117.80(10) |
| O(8)-Nd(2)-O(2) | 70.04(9)   | O(9)-Nd(2)-O(2) | 82.90(10)  |
| O(3)-Nd(2)-O(5) | 119.20(10) | O(6)-Nd(2)-O(5) | 71.85(10)  |
| O(8)-Nd(2)-O(5) | 69.14(9)   | O(9)-Nd(2)-O(5) | 133.61(10) |
| O(2)-Nd(2)-O(5) | 66.28(9)   | O(3)-Nd(2)-N(4) | 82.32(12)  |
| O(6)-Nd(2)-N(4) | 82.77(11)  | O(8)-Nd(2)-N(4) | 115.98(11) |

|                  |            |                  |            |
|------------------|------------|------------------|------------|
| O(9)-Nd(2)-N(4)  | 72.15(12)  | O(2)-Nd(2)-N(4)  | 148.16(12) |
| O(5)-Nd(2)-N(4)  | 145.51(12) | O(3)-Nd(2)-N(3)  | 141.99(11) |
| O(6)-Nd(2)-N(3)  | 73.76(11)  | O(8)-Nd(2)-N(3)  | 76.98(10)  |
| O(9)-Nd(2)-N(3)  | 99.30(12)  | O(2)-Nd(2)-N(3)  | 143.44(10) |
| O(5)-Nd(2)-N(3)  | 87.78(11)  | N(3)-Nd(2)-N(4)  | 62.41(13)  |
| Nd(1)-O(2)-Nd(2) | 95.71(10)  | Nd(1)-O(5)-Nd(2) | 95.64(9)   |
| Nd(1)-O(8)-Nd(2) | 104.22(10) |                  |            |

**Table S3.** Selected bond lengths (Å) and angles (°) for complex **10**

|                 |            |                 |            |
|-----------------|------------|-----------------|------------|
| Yb(2)-N(1)      | 2.502(4)   | Yb(2)-N(2)      | 2.474(3)   |
| Yb(1)-N(3)      | 2.528(4)   | Yb(1)-N(4)      | 2.503(3)   |
| Yb(1)-O(1)      | 2.222(3)   | Yb(1)-O(2)      | 2.377(3)   |
| Yb(2)-O(2)      | 2.407(3)   | Yb(2)-O(3)      | 2.216(3)   |
| Yb(2)-O(4)      | 2.199(3)   | Yb(2)-O(5)      | 2.370(3)   |
| Yb(1)-O(5)      | 2.423(3)   | Yb(1)-O(6)      | 2.213(3)   |
| Yb(2)-O(7)      | 2.278(3)   | Yb(1)-O(8)      | 2.313(3)   |
| Yb(2)-O(8)      | 2.350(3)   | Yb(1)-O(9)      | 2.260(3)   |
| O(6)-Yb(1)-O(1) | 83.25(11)  | O(6)-Yb(1)-O(9) | 143.56(10) |
| O(1)-Yb(1)-O(9) | 76.75(12)  | O(6)-Yb(1)-O(8) | 139.96(10) |
| O(1)-Yb(1)-O(8) | 132.52(10) | O(9)-Yb(1)-O(8) | 72.78(10)  |
| O(6)-Yb(1)-O(2) | 114.02(10) | O(1)-Yb(1)-O(2) | 75.66(10)  |
| O(9)-Yb(1)-O(2) | 90.26(11)  | O(8)-Yb(1)-O(2) | 69.04(10)  |
| O(6)-Yb(1)-O(5) | 75.24(10)  | O(1)-Yb(1)-O(5) | 122.96(11) |
| O(9)-Yb(1)-O(5) | 141.11(10) | O(8)-Yb(1)-O(5) | 69.82(9)   |
| O(2)-Yb(1)-O(5) | 66.80(9)   | O(6)-Yb(1)-N(4) | 73.02(11)  |
| O(1)-Yb(1)-N(4) | 82.28(12)  | O(9)-Yb(1)-N(4) | 74.33(12)  |
| O(8)-Yb(1)-N(4) | 121.81(11) | O(2)-Yb(1)-N(4) | 155.55(11) |
| O(5)-Yb(1)-N(4) | 136.15(11) | O(6)-Yb(1)-N(3) | 80.41(11)  |
| O(1)-Yb(1)-N(3) | 146.73(11) | O(9)-Yb(1)-N(3) | 100.18(12) |
| O(8)-Yb(1)-N(3) | 75.06(10)  | O(2)-Yb(1)-N(3) | 137.57(10) |
| O(5)-Yb(1)-N(3) | 80.28(10)  | N(4)-Yb(1)-N(3) | 65.30(12)  |
| O(4)-Yb(2)-O(3) | 78.40(12)  | O(4)-Yb(2)-O(7) | 84.92(12)  |
| O(3)-Yb(2)-O(7) | 146.82(11) | O(4)-Yb(2)-O(8) | 136.39(11) |
| O(3)-Yb(2)-O(8) | 137.98(10) | O(7)-Yb(2)-O(8) | 71.75(10)  |
| O(4)-Yb(2)-O(5) | 76.17(11)  | O(3)-Yb(2)-O(5) | 108.05(11) |
| O(7)-Yb(2)-O(5) | 95.28(11)  | O(8)-Yb(2)-O(5) | 70.14(9)   |
| O(4)-Yb(2)-O(2) | 122.31(11) | O(3)-Yb(2)-O(2) | 72.92(10)  |
| O(7)-Yb(2)-O(2) | 139.45(10) | O(8)-Yb(2)-O(2) | 67.93(10)  |
| O(2)-Yb(2)-O(5) | 67.19(9)   | O(4)-Yb(2)-N(2) | 142.95(12) |
| O(3)-Yb(2)-N(2) | 83.25(11)  | O(7)-Yb(2)-N(2) | 93.62(12)  |

|                  |            |                  |            |
|------------------|------------|------------------|------------|
| O(8)-Yb(2)-N(2)  | 76.49(11)  | O(5)-Yb(2)-N(2)  | 140.59(11) |
| O(2)-Yb(2)-N(2)  | 81.38(11)  | O(4)-Yb(2)-N(1)  | 77.62(12)  |
| O(3)-Yb(2)-N(1)  | 72.50(12)  | O(7)-Yb(2)-N(1)  | 76.04(12)  |
| O(8)-Yb(2)-N(1)  | 128.23(12) | O(5)-Yb(2)-N(1)  | 153.01(11) |
| O(2)-Yb(2)-N(1)  | 134.61(11) | N(2)-Yb(2)-N(1)  | 66.20(12)  |
| Yb(1)-O(2)-Yb(2) | 97.79(10)  | Yb(1)-O(5)-Yb(2) | 97.54(10)  |
| Yb(1)-O(8)-Yb(2) | 101.27(10) |                  |            |

---

IR spectra data of complexes **2-10** (cm<sup>-1</sup>):

Complex **2**: 1625(m), 1602(w), 1553(m), 1518(w), 1494(w), 1427(w), 1262(vs), 1184(vs), 1161(vw), 1146(vw), 1125(m), 1100(m), 998(vw), 983(s), 883(s), 864(w), 833(s), 820(vw), 775(w), 752(w), 722(m).

Complex **3**: 1614(s), 1549(m), 1529(w), 1494(m), 1425(m), 1388(vw), 1347(w), 1269(vs), 1185(vs), 1145(vw), 1114(vs), 982(s), 885(s), 864(w), 843(m), 820(s), 769(w), 775(w), 722(m).

Complex **4**: 1614(s), 1549(m), 1531(vw), 1494(s), 1425(m), 1388(w), 1347(w), 1291(vw), 1270(vs), 1185(vs), 1145(vw), 1115(vs), 983(s), 884(s), 864(w), 843(w), 820(m), 779(vw), 769(w), 755(w), 722(m).

Complex **5**: 1615(s), 1549(m), 1533(w), 1495(m), 1425(m), 1389(w), 1347(w), 1268(vs), 1184(vs), 1145(vw), 1112(vs), 983(s), 885(s), 864(w), 843(w), 819(s), 779(vw), 769(w), 755(w), 722(m).

Complex **6**: 1614(s), 1550(m), 1535(w), 1495(m), 1425(m), 1388(w), 1347(w), 1269(vs), 1184(vs), 1145(vw), 1113(vs), 984(s), 886(s), 864(vw), 844(w), 819(s), 779(vw), 769(w), 756(w), 722(m), 706(vw).

Complex **7**: 1615(s), 1552(m), 1537(w), 1496(m), 1425(m), 1389(w), 1345(w), 1268(vs), 1184(vs), 1144(vw), 1114(vs), 1037(vw), 986(s), 887(s), 865(vw), 844(w), 819(s), 779(vw), 770(w), 756(w), 722(m), 705(vw).

Complex **8**: 1615(s), 1552(m), 1537(w), 1497(m), 1479(vw), 1425(m), 1389(w), 1347(w), 1268(vs), 1184(vs), 1144(vw), 1114(vs), 1038(vw), 986(s), 887(s), 865(vw), 844(w), 819(s), 779(vw), 770(w), 756(w), 723(m), 705(vw).

Complex **9**: 1626(vw), 1615(s), 1553(m), 1538(w), 1522(vw), 1497(m), 1425(m), 1389(w), 1347(w), 1267(vs), 1185(vs), 1116(vs), 1038(vw), 988(s), 889(s), 865(vw), 845(w), 819(s), 770(vw), 756(w), 723(m).

Complex **10**: 1629(w), 1608(w), 1556(m), 1537(w), 1522(vw), 1499(m), 1425(m), 1266(vs), 1185(vs), 1118(vs), 1038(vw), 990(s), 890(s), 866(w), 845(w), 829(vw), 818(m), 771(w), 755(w), 740(vw), 723(m).

Elemental analysis found (calc) % of complexes **2-10**:

Complex **2**: C: 38.71(38.80) H: 1.63(1.59) N: 4.04(4.02).

Complex **3**: C: 38.52(38.46) H: 1.57(1.58) N: 4.02(3.99).

Complex **4**: C: 38.44(38.37) H: 1.60(1.57) N: 3.92(3.98).

Complex **5**: C: 38.01(38.09) H: 1.52(1.56) N: 4.00(3.95).

Complex **6**: C: 38.03(38.00) H: 1.55(1.56) N: 3.91(3.94).

Complex **7**: C: 37.59(37.68) H: 1.52(1.55) N: 3.93(3.91).

Complex **8**: C: 37.61(37.56) H: 1.53(1.54) N: 3.85(3.89).

Complex **9**: C: 37.40(37.47) H: 1.54(1.54) N: 3.91(3.88).

Complex **10**: C: 37.19(37.26) H: 1.55(1.53) N: 3.88(3.86).

The calculation result by SHAPE software:

Dy1:

|          |        |                                            |
|----------|--------|--------------------------------------------|
| HBPY-8   | 3 D6h  | Hexagonal bipyramid                        |
| CU-8     | 4 Oh   | Cube                                       |
| SAPR-8   | 5 D4d  | Square antiprism                           |
| TDD-8    | 6 D2d  | Triangular dodecahedron                    |
| JGBF-8   | 7 D2d  | Johnson gyrobifastigium J26                |
| JETBPY-8 | 8 D3h  | Johnson elongated triangular bipyramid J14 |
| JBTPR-8  | 9 C2v  | Biaugmented trigonal prism J50             |
| BTPR-8   | 10 C2v | Biaugmented trigonal prism                 |
| JSD-8    | 11 D2d | Snub diphenoid J84                         |
| TT-8     | 12 Td  | Triakis tetrahedron                        |

|                   |          |        |
|-------------------|----------|--------|
| Structure [ML8 ]: | HBPY-8   | 15.011 |
|                   | CU-8     | 8.872  |
|                   | SAPR-8   | 1.340  |
|                   | TDD-8    | 1.344  |
|                   | JGBF-8   | 15.665 |
|                   | JETBPY-8 | 26.840 |
|                   | JBTPR-8  | 2.433  |
|                   | BTPR-8   | 1.861  |
|                   | JSD-8    | 4.121  |
|                   | TT-8     | 9.619  |

Dy2:

|          |        |                                            |
|----------|--------|--------------------------------------------|
| HBPY-8   | 3 D6h  | Hexagonal bipyramid                        |
| CU-8     | 4 Oh   | Cube                                       |
| SAPR-8   | 5 D4d  | Square antiprism                           |
| TDD-8    | 6 D2d  | Triangular dodecahedron                    |
| JGBF-8   | 7 D2d  | Johnson gyrobifastigium J26                |
| JETBPY-8 | 8 D3h  | Johnson elongated triangular bipyramid J14 |
| JBTPR-8  | 9 C2v  | Biaugmented trigonal prism J50             |
| BTPR-8   | 10 C2v | Biaugmented trigonal prism                 |
| JSD-8    | 11 D2d | Snub diphenoid J84                         |
| TT-8     | 12 Td  | Triakis tetrahedron                        |

|                   |          |        |
|-------------------|----------|--------|
| Structure [ML8 ]: | HBPY-8   | 15.922 |
|                   | CU-8     | 10.621 |
|                   | SAPR-8   | 2.099  |
|                   | TDD-8    | 1.067  |
|                   | JGBF-8   | 14.168 |
|                   | JETBPY-8 | 28.353 |
|                   | JBTPR-8  | 2.058  |
|                   | BTPR-8   | 1.617  |
|                   | JSD-8    | 3.339  |
|                   | TT-8     | 11.354 |

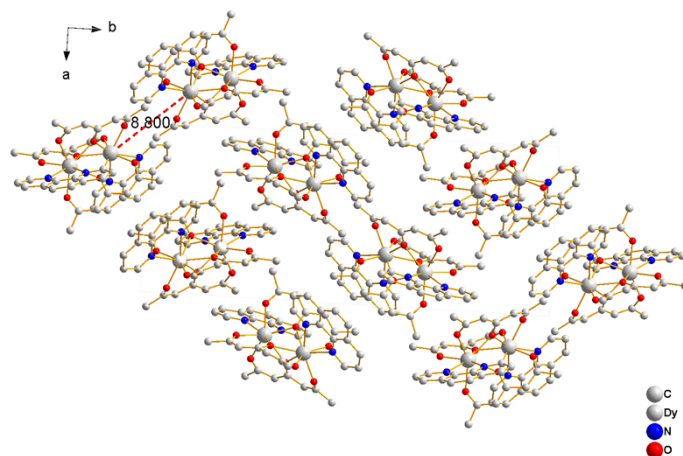

**Fig. S1** Packing arrangement of complex **1** along the *c* axis, hydrogen and fluorine atoms are omitted for clarity, the dotted line is the shortest intermolecular Dy-Dy distance.

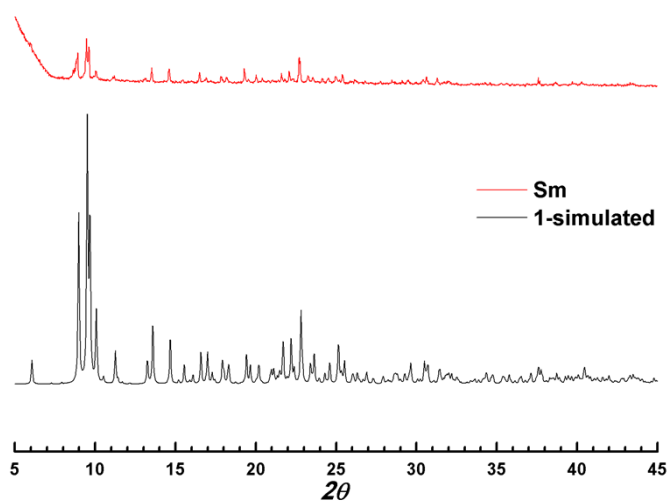

**Fig. S2** Powder XRD analysis of **3**. The black line is simulated data from single crystal data of **1**.

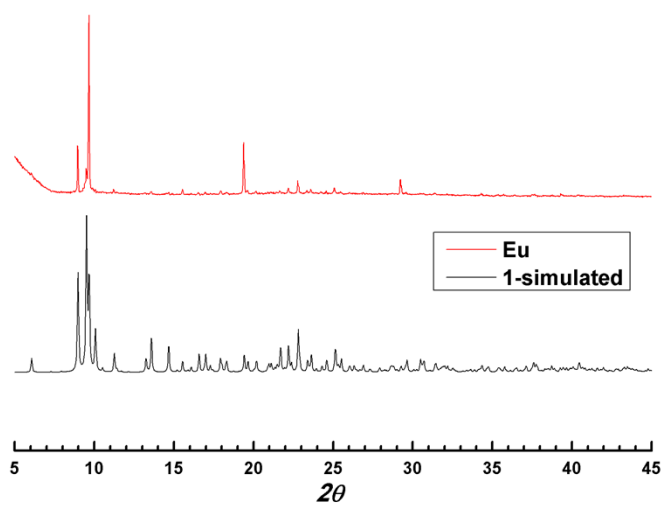

**Fig. S3** Powder XRD analysis of **4**. The black line is simulated data from single crystal data of **1**.

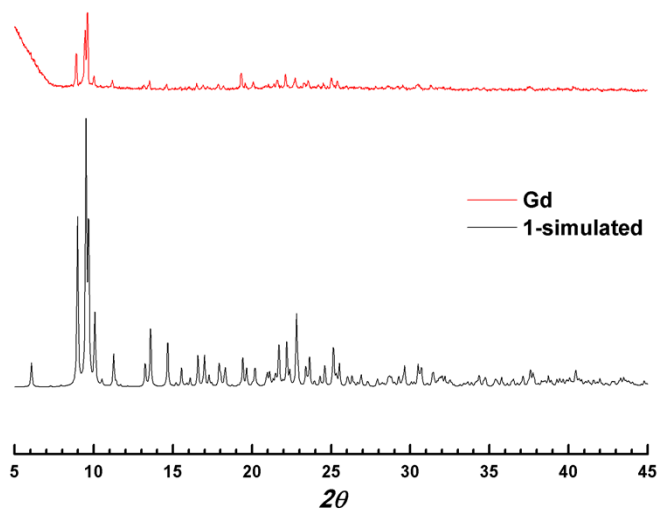

**Fig. S4** Powder XRD analysis of **5**. The black line is simulated data from single crystal data of **1**.

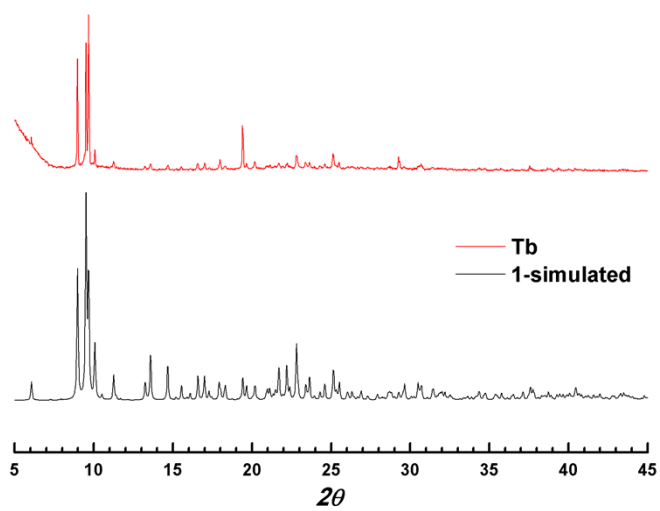

**Fig. S5** Powder XRD analysis of **6**. The black line is simulated data from single crystal data of **1**.

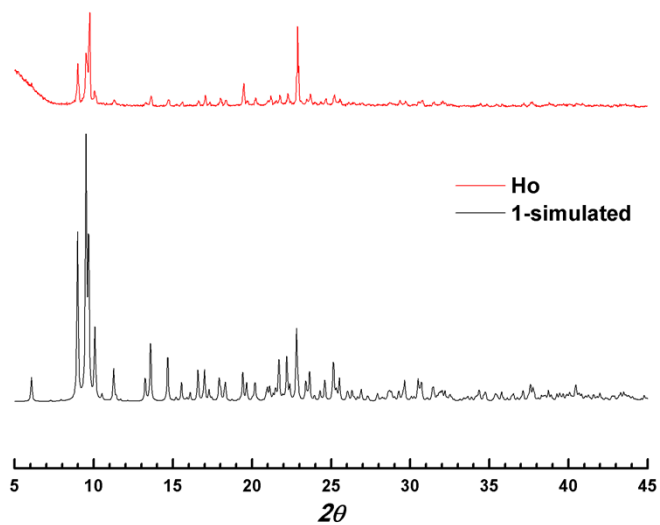

**Fig. S6** Powder XRD analysis of **7**. The black line is simulated data from single crystal data of **1**.



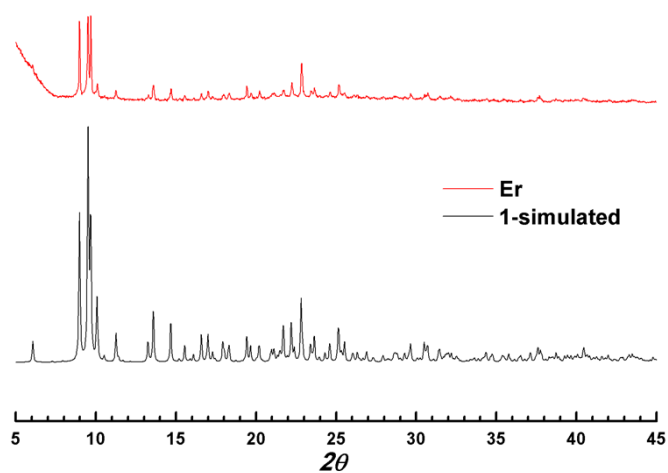

**Fig. S7** Powder XRD analysis of **8**. The black line is simulated data from single crystal data of **1**.

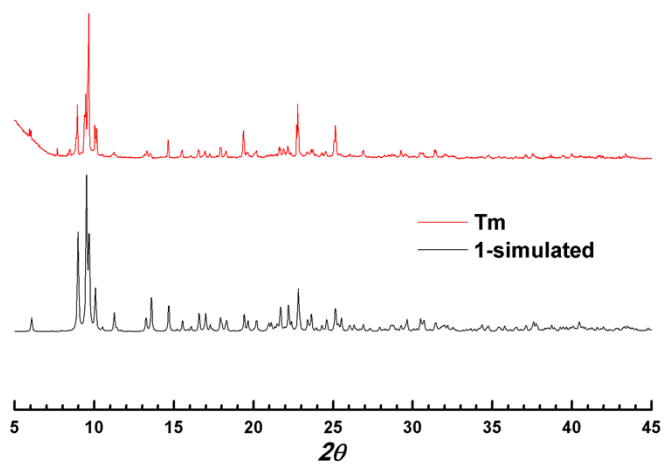

**Fig. S8** Powder XRD analysis of **9**. The black line is simulated data from single crystal data of **1**.

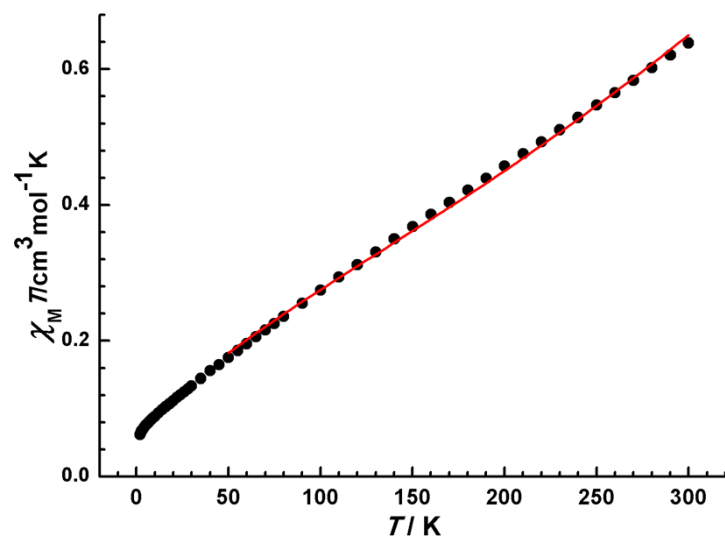

**Fig. S9**  $\chi_M T$  versus  $T$  curve of complex **3**, the red line is the best simulation in the temperature range 50-300 K with the parameters of  $\lambda = 224.3 \text{ cm}^{-1}$ ,  $g = 0.33$ ,  $zj' = -2.68 \text{ cm}^{-1}$ .

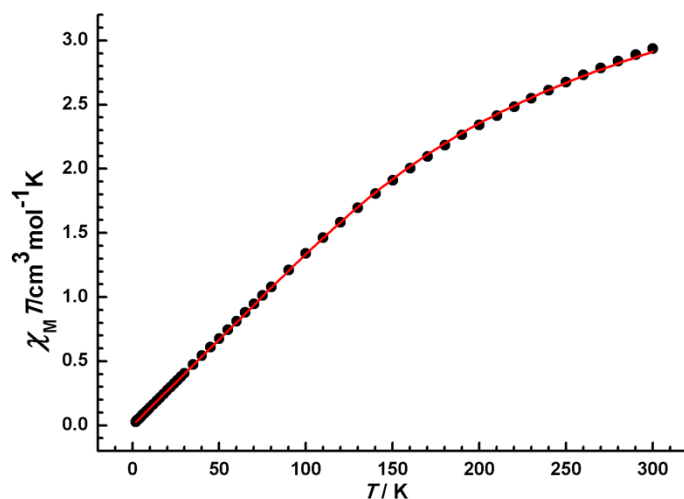

**Fig. S10**  $\chi_M T$  versus  $T$  curve of complex 4, the red line is the best simulation in the temperature range 2-300 K with the parameters of  $\lambda = 346.9 \text{ cm}^{-1}$ ,  $g = 0.79$ ,  $z_j' = 1.38 \text{ cm}^{-1}$ .

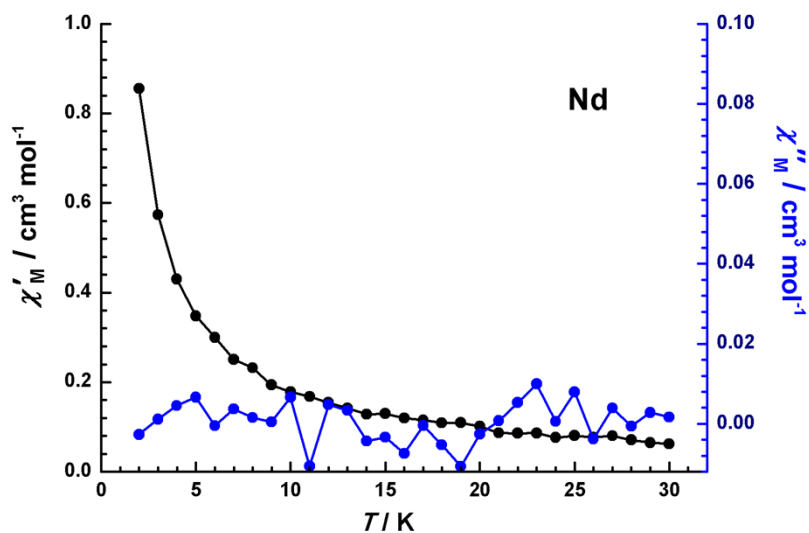

**Fig. S11** Temperature dependence of the in-phase ( $\chi'$ ) and out-of-phase ( $\chi''$ ) components of the alternating-current susceptibilities for complex 2 under zero  $dc$  field at the frequency of 1000 Hz.

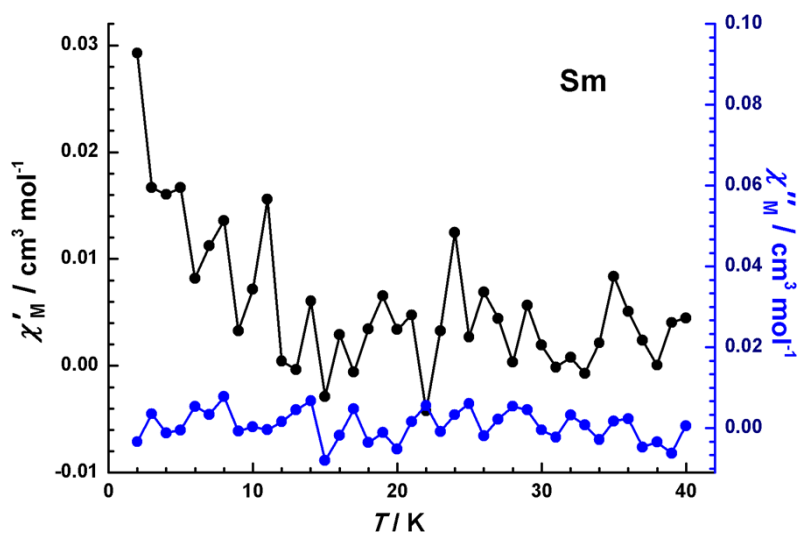

**Fig. S12** Temperature dependence of the in-phase ( $\chi'$ ) and out-of-phase ( $\chi''$ ) components of the alternating-current susceptibilities for complex 3 under zero  $dc$  field at the frequency of 1000 Hz.

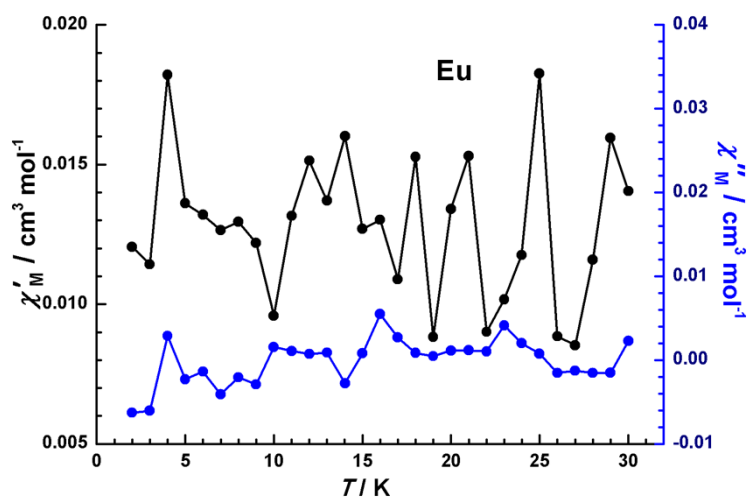

**Fig. S13** Temperature dependence of the in-phase ( $\chi'$ ) and out-of-phase ( $\chi''$ ) components of the alternating-current susceptibilities for complex 4 under zero  $dc$  field at the frequency of 1000 Hz.

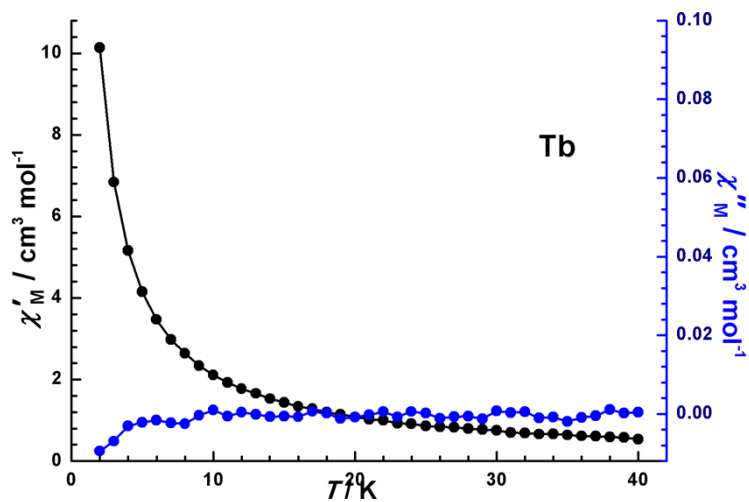

**Fig. S14** Temperature dependence of the in-phase ( $\chi'$ ) and out-of-phase ( $\chi''$ ) components of the alternating-current susceptibilities for complex 6 under zero  $dc$  field at the frequency of 1000 Hz.

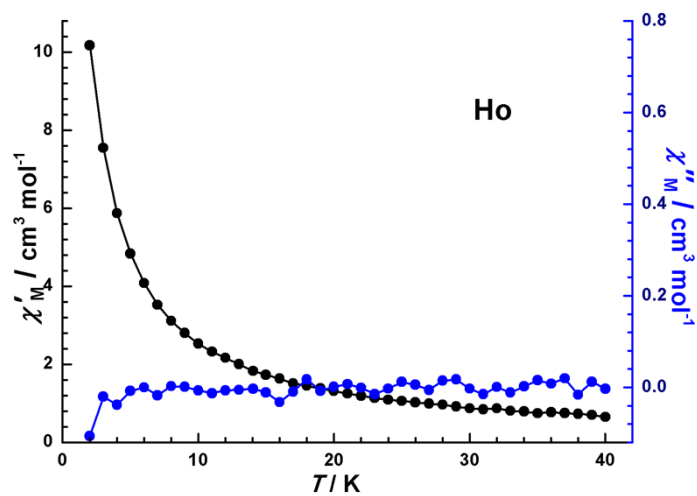

**Fig. S15** Temperature dependence of the in-phase ( $\chi'$ ) and out-of-phase ( $\chi''$ ) components of the alternating-current susceptibilities for complex 7 under zero  $dc$  field at the frequency of 1000 Hz.

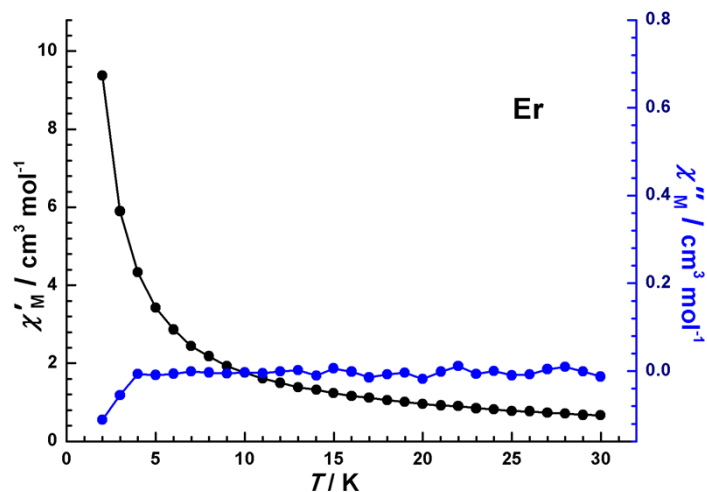

**Fig. S16** Temperature dependence of the in-phase ( $\chi'$ ) and out-of-phase ( $\chi''$ ) components of the alternating-current susceptibilities for complex **8** under zero  $dc$  field at the frequency of 1000 Hz.

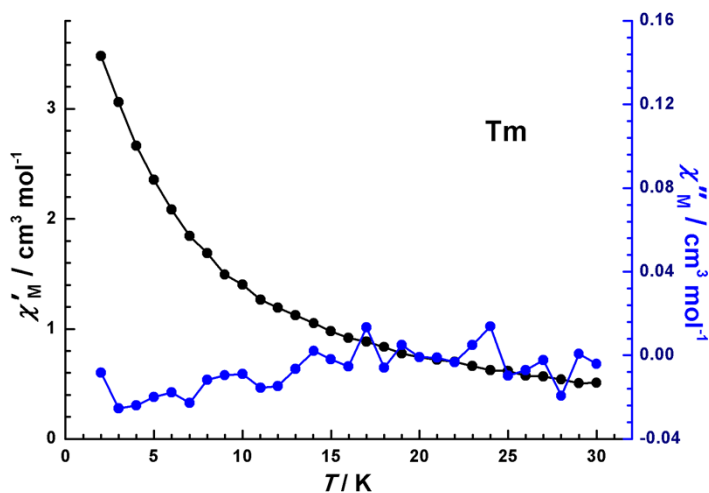

**Fig. S17** Temperature dependence of the in-phase ( $\chi'$ ) and out-of-phase ( $\chi''$ ) components of the alternating-current susceptibilities for complex **9** under zero  $dc$  field at the frequency of 1000 Hz.

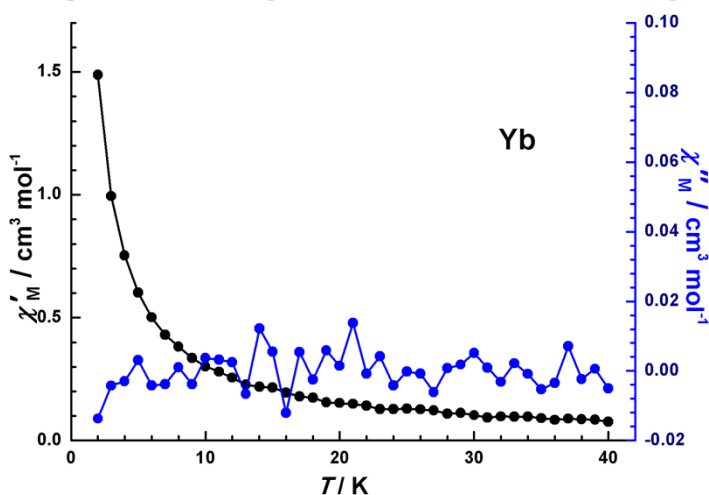

**Fig. S18** Temperature dependence of the in-phase ( $\chi'$ ) and out-of-phase ( $\chi''$ ) components of the alternating-current susceptibilities for complex **10** under zero  $dc$  field at the frequency of 1000 Hz.
